# Supplementary material for: Comprehensive Evaluation of the Volatomic Fingerprint of Saffron from Campania towards Its Authenticity and Quality
Source: MDPI journal article supplement (doi:10.3390/foods11030366), 2022-01-27
Supplement: s1 [file s1]

# **Comprehensive evaluation of the volatonic fingerprint of Saffron from Campania region towards its authentication and quality control**

Rosaria Cozzolino <sup>1</sup>, Matteo Stocchero <sup>2</sup>, and José S. Câmara<sup>3</sup>

## **SUPPLEMENTARY MATERIAL**

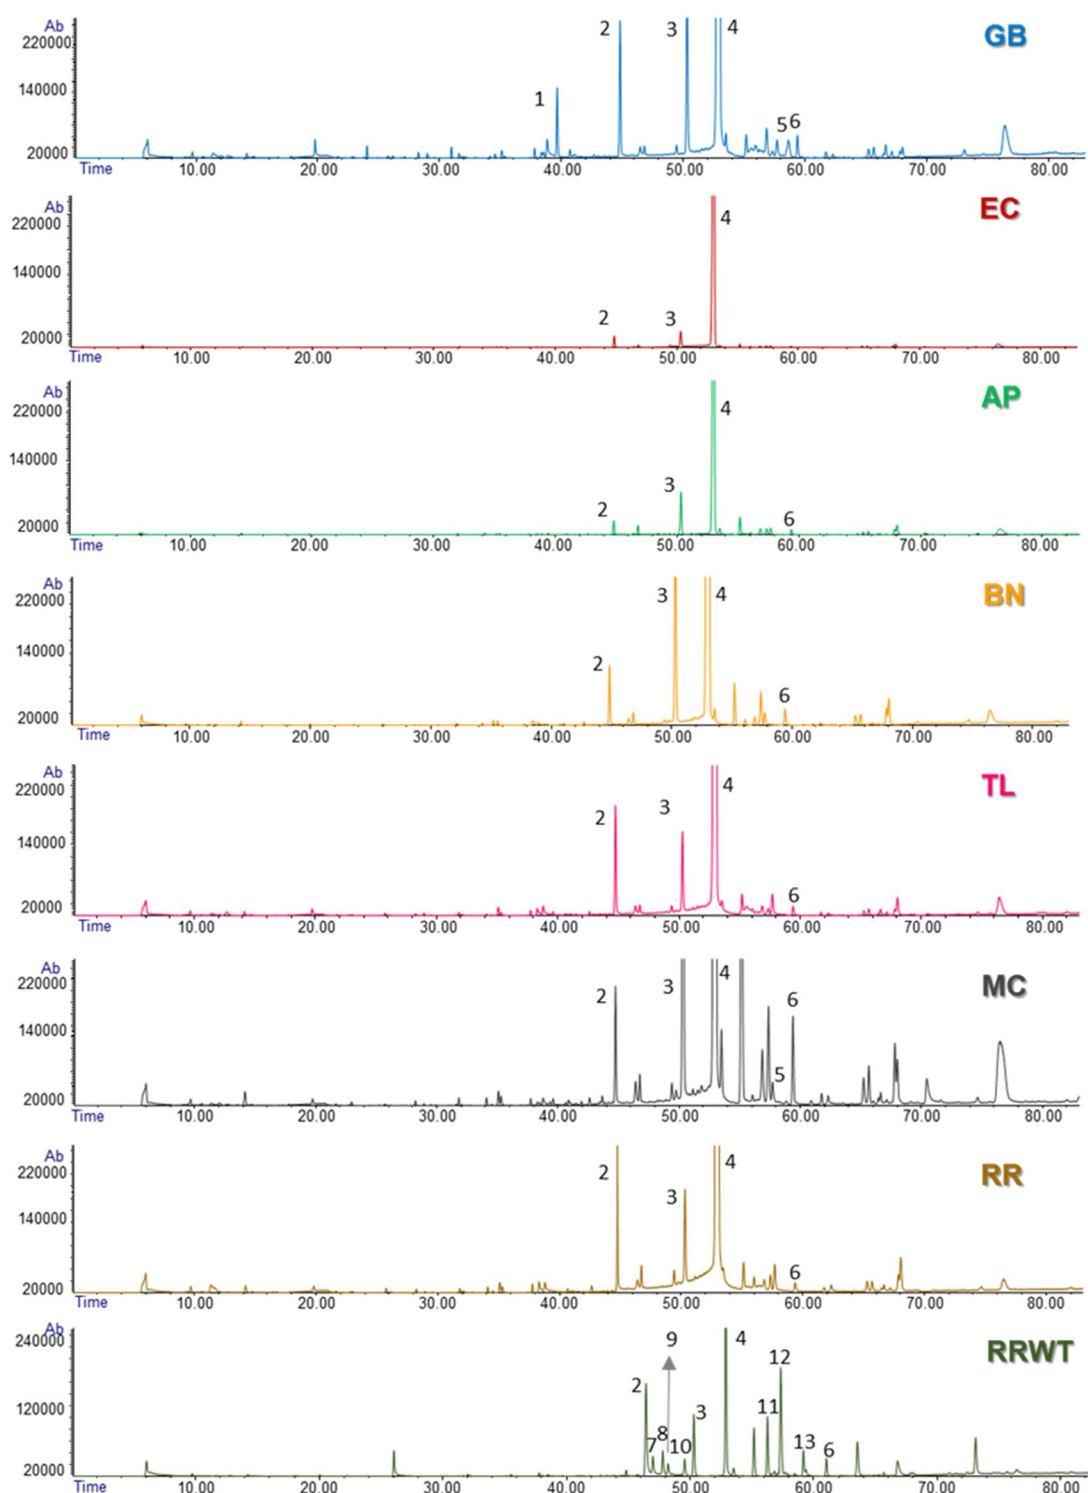

**Figure S1.** Representative chromatograms of the eight saffron samples (see text for the sample code). Numbers above the peaks refer to the VOCs identified in Table 1. (1)  $\beta$ -Isophorone; (2) Benzaldehyde; (3)  $\alpha$ -Isophorone; (4) Safranal; (5) 2-Hydroxyisophorone; (6) 4-Ketoisophorone; (7) Lilac aldehyde isomer A; (8) Lilac aldehyde isomer B; (9) Lilac aldehyde isomer C; (10) Lilac aldehyde isomer D; (11) Lilac alcohol isomer A; (12) Lilac alcohol isomer C; (13) Lilac alcohol isomer D.

**Table S1.** VOCs concentration expressed as median [min-max] in the investigated samples.

| ID <sup>a</sup> | GB                  | EC                  | AP                  | BN                  | TL                  | MC                  | RR                  | RRWT                  |
|-----------------|---------------------|---------------------|---------------------|---------------------|---------------------|---------------------|---------------------|-----------------------|
| V1              | 31.3 [30.6-31.7]    | 0 [0-0]             | 0 [0-0]             | 0 [0-0]             | 0 [0-0]             | 0 [0-0]             | 0 [0-0]             | 0 [0-0]               |
| V2              | 31.7 [27.6-32.4]    | 20.3 [17.7-20.6]    | 22.9 [18.1-37]      | 34.4 [27.8-42.2]    | 24.1 [17.8-38]      | 54.4 [44.2-68.1]    | 18.9 [18.9-22.8]    | 0 [0-0]               |
| V3              | 17.7 [0-18.1]       | 0 [0-0]             | 0 [0-0]             | 0 [0-0]             | 0 [0-0]             | 0 [0-0]             | 0 [0-0]             | 0 [0-0]               |
| V4              | 35.6 [17.8-36.4]    | 11 [10.5-12]        | 27.5 [17.6-33.7]    | 62.2 [45.5-100.8]   | 36.8 [26.3-39.7]    | 47.8 [44.4-59.7]    | 0 [0-0]             | 0 [0-0]               |
| V5              | 24 [23.5-42.3]      | 11.9 [11.3-12.9]    | 8.4 [8.3-13.2]      | 42.5 [29.4-47.9]    | 22.2 [13.6-30.8]    | 37.2 [23-40.3]      | 0 [0-0]             | 0 [0-0]               |
| V6              | 221.6 [64.2-226.6]  | 53.1 [50.5-57.8]    | 32.3 [0-110.8]      | 0 [0-0]             | 0 [0-0]             | 0 [0-0]             | 0 [0-0]             | 0 [0-0]               |
| V7              | 0 [0-0]             | 6.5 [6.2-7]         | 7.6 [7.3-11.2]      | 11.8 [11.7-17.6]    | 0 [0-0]             | 18.6 [17.6-27.1]    | 0 [0-0]             | 0 [0-0]               |
| V8              | 0 [0-0]             | 239.4 [156.9-411.1] | 206.4 [179.5-298.8] | 270.5 [162.4-280.1] | 0 [0-0]             | 254.4 [202-273.6]   | 97.1 [84.9-150]     | 0 [0-0]               |
| V9              | 32.6 [24.3-33.3]    | 15.1 [14.4-16.5]    | 0 [0-0]             | 21.8 [15.2-34]      | 23.8 [16.3-23.9]    | 25.9 [21.1-27.6]    | 19.1 [18.9-32.6]    | 0 [0-0]               |
| V10             | 28.4 [15-29.1]      | 0 [0-0]             | 0 [0-0]             | 0 [0-0]             | 12 [8.3-13.6]       | 0 [0-0]             | 16.2 [12.9-18.3]    | 0 [0-0]               |
| V11             | 61 [20.9-62.4]      | 23 [21.8-25]        | 64.8 [56.7-86.8]    | 26.3 [25.2-45.4]    | 18.9 [12.6-26.7]    | 22.9 [20.8-30.1]    | 27.3 [11.1-28.6]    | 0 [0-0]               |
| V12             | 267.2 [198.5-286.4] | 77.5 [42.1-100.7]   | 65.1 [53.3-76.7]    | 105.9 [95.2-137.2]  | 173.8 [145.2-198.2] | 78.3 [63.3-127]     | 71.6 [56.4-110.6]   | 49.9 [42.1-57.7]      |
| V13             | 0 [0-0]             | 8.4 [8-9.2]         | 0 [0-0]             | 0 [0-0]             | 12.1 [11.2-12.9]    | 0 [0-0]             | 0 [0-0]             | 0 [0-0]               |
| V14             | 0 [0-0]             | 36.5 [34.7-39.8]    | 0 [0-0]             | 65.2 [59-74.7]      | 0 [0-0]             | 44.6 [43.3-53.4]    | 0 [0-0]             | 0 [0-0]               |
| V15             | 30.8 [7.5-31.5]     | 0 [0-0]             | 0 [0-0]             | 0 [0-0]             | 0 [0-0]             | 0 [0-0]             | 0 [0-0]             | 0 [0-0]               |
| V16             | 501.2 [120.5-512.3] | 13.7 [13-14.9]      | 0 [0-0]             | 0 [0-0]             | 0 [0-0]             | 0 [0-0]             | 0 [0-0]             | 6.9 [5.5-8.2]         |
| V17             | 19.3 [7.3-19.7]     | 0 [0-0]             | 0 [0-0]             | 0 [0-0]             | 0 [0-0]             | 0 [0-0]             | 0 [0-0]             | 0 [0-0]               |
| V18             | 36.9 [36.1-39.1]    | 83.2 [79.1-90.6]    | 34.6 [29.9-38.9]    | 128.4 [106.2-142.1] | 84.4 [79.4-89.7]    | 32.5 [21-39.8]      | 85.5 [85.1-91.4]    | 1055.7 [931.9-1179.4] |
| V19             | 70.2 [21.3-71.7]    | 13.4 [12.8-14.6]    | 7.2 [7.1-12.7]      | 17.2 [16.4-19]      | 12.1 [9.9-15.1]     | 10.6 [8.8-16.1]     | 12.8 [12.2-17.1]    | 42.4 [39.9-44.9]      |
| V20             | 94.7 [18.5-96.8]    | 0 [0-0]             | 0 [0-0]             | 0 [0-0]             | 0 [0-0]             | 0 [0-0]             | 0 [0-0]             | 0 [0-0]               |
| V21             | 86.2 [58.5-88.2]    | 37.1 [35.2-40.4]    | 22.3 [20.1-29.9]    | 54.3 [51.5-59.8]    | 38.1 [37.8-49]      | 73.7 [58.7-76.5]    | 45.2 [42.4-58.4]    | 14.1 [14-14.2]        |
| V22             | 53.2 [49.3-54.4]    | 11.5 [11-12.5]      | 12.2 [11-18.5]      | 25.6 [23.4-27.6]    | 61.7 [55.1-64.4]    | 29.4 [24.8-35.5]    | 18.1 [15.7-19.7]    | 0 [0-0]               |
| V23             | 14.6 [12.3-14.9]    | 0 [0-0]             | 7.4 [2.8-10.5]      | 0 [0-0]             | 13.8 [13-14.4]      | 12.9 [10.4-20.2]    | 0 [0-0]             | 0 [0-0]               |
| V24             | 15.2 [6-15.5]       | 0 [0-0]             | 0 [0-0]             | 0 [0-0]             | 0 [0-0]             | 0 [0-0]             | 0 [0-0]             | 0 [0-0]               |
| V25             | 0 [0-0]             | 0 [0-0]             | 0 [0-0]             | 0 [0-0]             | 0 [0-0]             | 0 [0-0]             | 0 [0-0]             | 12.7 [11.9-13.6]      |
| V26             | 0 [0-0]             | 0 [0-0]             | 0 [0-0]             | 0 [0-0]             | 0 [0-0]             | 12.8 [10-19.2]      | 0 [0-0]             | 0 [0-0]               |
| V27             | 0 [0-0]             | 0 [0-0]             | 0 [0-0]             | 49.4 [33.2-56.3]    | 0 [0-0]             | 0 [0-0]             | 0 [0-0]             | 0 [0-0]               |
| V28             | 472.2 [116.8-482.8] | 17.8 [16.9-19.4]    | 0 [0-0]             | 0 [0-0]             | 12.2 [0-13.3]       | 12.6 [6.5-18.5]     | 10.2 [5.3-14.5]     | 15.1 [14.8-15.5]      |
| V29             | 91.3 [48.5-93.3]    | 0 [0-0]             | 0 [0-0]             | 0 [0-0]             | 19.3 [10.4-19.4]    | 0 [0-0]             | 0 [0-0]             | 0 [0-0]               |
| V30             | 0 [0-0]             | 0 [0-0]             | 0 [0-0]             | 0 [0-0]             | 0 [0-0]             | 0 [0-0]             | 0 [0-0]             | 75.1 [63.5-86.7]      |
| V31             | 37.2 [19.8-38]      | 134.3 [105.4-169.8] | 169.8 [140.6-176.1] | 151.7 [149.9-175.8] | 72.8 [70.9-102.8]   | 121.8 [99.6-148.5]  | 89.4 [53-94]        | 0 [0-0]               |
| V32             | 27 [13.7-27.6]      | 25.1 [23.8-27.3]    | 11.6 [7.8-25.7]     | 61.8 [35.8-65.4]    | 49.5 [30.3-59.1]    | 14.9 [11.8-20.7]    | 50.5 [32.3-66.1]    | 0 [0-0]               |
| V33             | 48.3 [16.7-68.2]    | 23.6 [22.4-25.7]    | 18.1 [14.8-24.8]    | 32.9 [20.4-36.9]    | 29.1 [19.3-39.8]    | 23 [19.6-45.1]      | 45.5 [35.3-55]      | 0 [0-0]               |
| V34             | 100.4 [74.6-111.3]  | 171 [162.5-186.2]   | 141.9 [123-166.9]   | 340 [298.4-392.7]   | 233.8 [197.9-260.2] | 247.3 [225.3-323.5] | 186.5 [147.2-193.8] | 0 [0-0]               |
| V35             | 30.6 [19.7-31.3]    | 69.4 [59.4-181]     | 155.2 [141.5-214.7] | 306.8 [237.8-359.1] | 92.9 [64.9-114.6]   | 140.7 [125-215.1]   | 129.3 [72.4-135.6]  | 0 [0-0]               |
| V36             | 0 [0-0]             | 0 [0-0]             | 0 [0-0]             | 0 [0-0]             | 0 [0-0]             | 0 [0-0]             | 0 [0-0]             | 72.1 [62.8-81.5]      |
| V37             | 93 [69.9-95.1]      | 144.8 [137.6-157.7] | 65 [52.7-78.7]      | 301.1 [249-310.6]   | 158 [112.2-198.9]   | 55.9 [51.1-88.3]    | 301.9 [151.8-465.6] | 77.7 [77.4-78]        |
| V38             | 333.5 [326.8-334.1] | 107.2 [101.9-116.7] | 141.6 [119.4-147.3] | 306.9 [305-332.1]   | 303.9 [255.2-328.1] | 149.2 [138.4-221.9] | 201 [170.8-206.8]   | 13.5 [13.2-13.7]      |
| V39             | 760.1 [700.7-907.8] | 32.8 [31.2-35.7]    | 57.8 [53.3-73.6]    | 92.3 [86-108.9]     | 93.3 [77.8-110.8]   | 94.8 [82.2-136.7]   | 50.3 [24.3-77.1]    | 25.3 [24.3-26.3]      |
| V40             | 102.5 [87.7-146.9]  | 0 [0-0]             | 31.4 [19.6-90.2]    | 90.5 [61.6-105.8]   | 68.1 [52.1-72.2]    | 41.7 [40.9-88.5]    | 110.2 [57.5-112.8]  | 0 [0-0]               |
| V41             | 0 [0-0]             | 0 [0-0]             | 0 [0-0]             | 0 [0-0]             | 40.7 [26.2-44.9]    | 31.8 [29.7-67.2]    | 54.5 [26.3-57.6]    | 0 [0-0]               |

|     |                           |                            |                           |                              |                              |                             |                            |                           |
|-----|---------------------------|----------------------------|---------------------------|------------------------------|------------------------------|-----------------------------|----------------------------|---------------------------|
| V42 | 23.6 [0-24.2]             | 35.9 [34.1-39.1]           | 43.2 [37-67.8]            | 0 [0-0]                      | 34.1 [25-42.4]               | 29.2 [25.3-63.3]            | 45.1 [25-51]               | 0 [0-0]                   |
| V43 | 0 [0-0]                   | 148.7 [141.3-161.8]        | 130.5 [117-181.1]         | 255.7 [203.5-265.8]          | 0 [0-0]                      | 0 [0-0]                     | 183.1 [86.4-232.4]         | 38.5 [32.9-44]            |
| V44 | 0 [0-0]                   | 0 [0-0]                    | 1661 [1539.9-2465.8]      | 4023.2 [3315.8-4639.1]       | 94.8 [89.6-112]              | 131.8 [101-174.6]           | 4261.8 [2808.9-4575]       | 163.9 [155.7-172.1]       |
| V45 | 0 [0-0]                   | 0 [0-0]                    | 0 [0-0]                   | 0 [0-0]                      | 0 [0-0]                      | 0 [0-0]                     | 0 [0-0]                    | 83 [77.7-88.4]            |
| V46 | 122.8 [112.6-192.1]       | 173.2 [135.6-184.4]        | 177 [157.7-267.3]         | 560.4 [369.7-669.4]          | 281.9 [252.4-366.8]          | 518.3 [411-878.3]           | 265.6 [162.8-312.1]        | 4000.7 [3667.8-4333.5]    |
| V47 | 0 [0-0]                   | 0 [0-0]                    | 1186.1 [1043.9-1650.6]    | 879.1 [684.6-906.2]          | 200.8 [167.9-246]            | 436.5 [379.3-609]           | 383.7 [278.6-415.4]        | 0 [0-0]                   |
| V48 | 0 [0-0]                   | 0 [0-0]                    | 0 [0-0]                   | 0 [0-0]                      | 0 [0-0]                      | 0 [0-0]                     | 0 [0-0]                    | 705.3 [633.3-777.3]       |
| V49 | 0 [0-0]                   | 0 [0-0]                    | 0 [0-0]                   | 0 [0-0]                      | 0 [0-0]                      | 0 [0-0]                     | 0 [0-0]                    | 860.3 [757.1-963.6]       |
| V50 | 0 [0-0]                   | 0 [0-0]                    | 0 [0-0]                   | 0 [0-0]                      | 0 [0-0]                      | 0 [0-0]                     | 0 [0-0]                    | 400.8 [361.3-440.2]       |
| V51 | 0 [0-0]                   | 0 [0-0]                    | 0 [0-0]                   | 0 [0-0]                      | 0 [0-0]                      | 0 [0-0]                     | 0 [0-0]                    | 619.2 [542-696.5]         |
| V52 | 0 [0-0]                   | 79 [75-86]                 | 190.3 [153.5-223.5]       | 380.8 [243.5-415.8]          | 97 [65-107]                  | 226.1 [167.9-348.7]         | 0 [0-0]                    | 0 [0-0]                   |
| V53 | 3719.8 [2669.4-3802.8]    | 4234.5 [4024-4609.7]       | 6937 [6041.1-8556]        | 13178.9 [10985.5-14691]      | 2227.4 [2038.4-2690.4]       | 12372.6 [10478.4-18194.5]   | 1988.8 [1339.6-2041]       | 2194.3 [1913.1-2475.5]    |
| V54 | 0 [0-0]                   | 226.2 [215-246.2]          | 129.4 [119.2-188.1]       | 0 [0-0]                      | 90.2 [71.3-114.6]            | 111.5 [78.5-223.4]          | 0 [0-0]                    | 0 [0-0]                   |
| V55 | 0 [0-0]                   | 216.8 [206.1-236.1]        | 0 [0-0]                   | 0 [0-0]                      | 113.1 [93.7-217.2]           | 97.1 [85.8-195.9]           | 0 [0-0]                    | 0 [0-0]                   |
| V56 | 0 [0-0]                   | 0 [0-0]                    | 138.8 [125.6-183.6]       | 346.8 [133-443]              | 100.5 [78.9-180.4]           | 164.4 [152.6-324.8]         | 0 [0-0]                    | 0 [0-0]                   |
| V57 | 65800.6 [50737.6-71692.7] | 187122.9 [168168.7-267330] | 100960 [90932.3-133823.1] | 259080.1 [179964.9-301712.1] | 133489.4 [106980.6-158759.1] | 114575.2 [98904.2-188687.4] | 207314.7 [130634.8-224023] | 16373.1 [15959.4-16786.7] |
| V58 | 369.1 [300.9-377.3]       | 0 [0-0]                    | 959.6 [802.4-1106.1]      | 1241.7 [918.8-1501.9]        | 343.1 [240-442.8]            | 1328.2 [1128-1668.1]        | 361.9 [256.7-502.5]        | 256.2 [230.8-281.5]       |
| V59 | 341.3 [317.9-368.3]       | 1937.7 [1861.2-3023.6]     | 2798.1 [2331.5-3426]      | 3419.4 [2516.5-3425.3]       | 612.6 [527.3-655.6]          | 4728.6 [3832.9-6610.7]      | 642.9 [415.7-778.8]        | 1648.4 [1557.5-1739.3]    |
| V60 | 0 [0-0]                   | 0 [0-0]                    | 0 [0-0]                   | 0 [0-0]                      | 0 [0-0]                      | 0 [0-0]                     | 0 [0-0]                    | 2002.9 [1719.9-2285.8]    |
| V61 | 0 [0-0]                   | 0 [0-0]                    | 1321.3 [1276-1490.7]      | 834.5 [680.5-1047.1]         | 355.2 [248.6-451.4]          | 1394 [951.3-1672.2]         | 253.8 [241.8-402.9]        | 0 [0-0]                   |
| V62 | 0 [0-0]                   | 0 [0-0]                    | 0 [0-0]                   | 0 [0-0]                      | 0 [0-0]                      | 0 [0-0]                     | 0 [0-0]                    | 102.8 [60.9-144.7]        |
| V63 | 0 [0-0]                   | 0 [0-0]                    | 0 [0-0]                   | 0 [0-0]                      | 0 [0-0]                      | 0 [0-0]                     | 0 [0-0]                    | 2261.2 [1963.3-2559.2]    |
| V64 | 0 [0-0]                   | 837.1 [836.3-855.9]        | 1153.7 [1089.6-1333.8]    | 2761.1 [1917.6-3068.2]       | 302.3 [174.5-394]            | 2028.6 [1670.9-3342]        | 379.9 [257.2-446.3]        | 879.5 [52.7-1706.4]       |
| V65 | 268 [242.4-529.4]         | 1054.1 [1008.9-1701.8]     | 1053.3 [982-1370.5]       | 1287.8 [711.8-1307.6]        | 760 [619.8-994.2]            | 456.7 [375.8-873]           | 1125.4 [452.3-2259.1]      | 124.7 [94.9-154.5]        |
| V66 | 129.8 [69.9-493.4]        | 44 [41.9-47.9]             | 0 [0-0]                   | 0 [0-0]                      | 0 [0-0]                      | 0 [0-0]                     | 0 [0-0]                    | 0 [0-0]                   |
| V67 | 329.2 [183.1-1116.4]      | 183.2 [166.1-183.2]        | 0 [0-0]                   | 0 [0-0]                      | 0 [0-0]                      | 0 [0-0]                     | 0 [0-0]                    | 0 [0-0]                   |
| V68 | 0 [0-0]                   | 0 [0-0]                    | 0 [0-0]                   | 0 [0-0]                      | 0 [0-0]                      | 0 [0-0]                     | 0 [0-0]                    | 778.6 [739.5-817.6]       |
| V69 | 379.7 [331-399.5]         | 384.6 [259.3-646.6]        | 1001.3 [913-1176.2]       | 1477.1 [1289-1487.7]         | 242.4 [239.5-306.1]          | 1653.8 [1098.4-2035.6]      | 296.5 [163.1-301.4]        | 193.9 [162.6-225.3]       |
| V70 | 132 [92.3-146.1]          | 80.3 [76.3-87.4]           | 139.7 [107.1-161.2]       | 147.9 [94.1-152.2]           | 122 [92.2-131.7]             | 191.4 [135.3-356.1]         | 124.9 [64.8-140.8]         | 0 [0-0]                   |
| V71 | 66 [53.2-91.5]            | 159.6 [138.9-256.1]        | 145.7 [123.6-149]         | 239.8 [165.7-256.5]          | 104.5 [96.8-125.1]           | 194.1 [146.9-349.4]         | 225.1 [110.3-231.6]        | 0 [0-0]                   |
| V72 | 194.1 [131-198.4]         | 451.8 [248.6-452]          | 0 [0-0]                   | 479.5 [311-528.6]            | 0 [0-0]                      | 632.1 [382.9-870.2]         | 0 [0-0]                    | 1412.9 [1410.4-1415.3]    |
| V73 | 0 [0-0]                   | 0 [0-0]                    | 511.7 [432.3-632.8]       | 518.7 [351-573.6]            | 176.9 [129.6-211.8]          | 0 [0-0]                     | 495.8 [192.6-504.2]        | 46.7 [46.5-46.8]          |
| V74 | 223.6 [148-228.6]         | 332.5 [264.7-409.4]        | 629.7 [527.2-728]         | 992 [672.8-998.7]            | 241.6 [182.1-265]            | 737.5 [555.5-1166.6]        | 301.5 [184-316.1]          | 124.3 [120-128.7]         |
| V75 | 241.9 [176.8-322.1]       | 143 [135.9-155.7]          | 153.2 [122.4-160.6]       | 249.2 [157.8-258.7]          | 237.8 [154.2-260.6]          | 198.7 [132.2-386]           | 191.8 [97.4-219.9]         | 0 [0-0]                   |
| V76 | 0 [0-0]                   | 0 [0-0]                    | 0 [0-0]                   | 0 [0-0]                      | 0 [0-0]                      | 0 [0-0]                     | 90.9 [50.3-123.6]          | 0 [0-0]                   |
| V77 | 0 [0-0]                   | 0 [0-0]                    | 0 [0-0]                   | 0 [0-0]                      | 124.9 [86.6-132.1]           | 0 [0-0]                     | 0 [0-0]                    | 1010.8 [928-1093.7]       |
| V78 | 182.1 [126.6-197.5]       | 1007.7 [1000-1012.1]       | 910.3 [836.5-1066.8]      | 1340.7 [933.3-1708.2]        | 208.2 [145.9-249.5]          | 1152.6 [886-2028.7]         | 466.5 [261.6-523.7]        | 92.5 [82.8-102.2]         |
| V79 | 211.2 [204.8-215.9]       | 1085.4 [1031.4-1181.5]     | 1625.6 [1500.3-1852.7]    | 2221.4 [1582.7-2533.6]       | 690.3 [527.8-777.9]          | 806.8 [546.4-1199.6]        | 1134.4 [543.8-1241.2]      | 112.4 [108.6-116.2]       |
| V80 | 2086.5 [1430.6-2133.1]    | 2472.1 [2349.2-2691.1]     | 4003.3 [3678.9-4506.6]    | 3401 [2012.7-3736]           | 1713.3 [1234-2043.8]         | 5576.7 [4298.7-8612.9]      | 1633.2 [474.6-2088.3]      | 0 [0-0]                   |

<sup>a</sup> For variable identification (from V1 to V80) please see Table 1.

Geographical origin os samples: GB- Fontanarosa; EC- Capriglia; AP- Lacedonia; BN- Benevento; TL- Caserta (Raviscanina); MC- Ottaviano; RR. Agerola; and RRWT- Agerola (spontaneous ecotype)

**Table S2.** VOCs selected by Kruskal-Wallis test controlling FDR by Benjamini-Hochberg procedure ( $\delta=0.01$ ); p is the p-value of the Kruskal-Wallis test.

| ID  | P       |
|-----|---------|
| V1  | 1.8E-04 |
| V7  | 3.9E-04 |
| V15 | 1.8E-04 |
| V16 | 1.8E-04 |
| V17 | 1.8E-04 |
| V24 | 1.8E-04 |
| V29 | 1.9E-03 |
| V35 | 2.6E-03 |
| V47 | 6.5E-04 |
| V52 | 9.9E-04 |
| V53 | 5.2E-04 |
| V58 | 7.5E-04 |
| V59 | 6.9E-04 |
| V61 | 4.5E-04 |
| V64 | 4.5E-04 |
| V66 | 1.8E-04 |
| V67 | 2.2E-04 |
| V69 | 8.2E-04 |
| V74 | 9.1E-04 |
| V80 | 3.0E-03 |

**Table S3.** Spearman's correlation coefficient  $\rho$  and its p-value (p) for the VOCs selected by FDR ( $\delta=0.05$ ).

| ID  | $\rho$ | p       |
|-----|--------|---------|
| V34 | -0.717 | 1.2E-04 |
| V5  | -0.675 | 4.1E-04 |
| V4  | -0.670 | 4.7E-04 |
| V55 | -0.637 | 1.1E-03 |
| V14 | -0.618 | 1.7E-03 |
| V22 | -0.601 | 2.4E-03 |
| V26 | -0.589 | 3.1E-03 |
